# Supplementary material for: Dietary pattern and odds of lung cancer: a large case-control study in Iran
Source: Springer Nature journal article supplement (doi:10.1186/s40795-025-01092-4), 2025-07-04
Supplement: MOESM1 [file 40795_2025_1092_MOESM1_ESM.docx]

| Appendix 1. Food grouping used in the dietary pattern analyses | |
| --- | --- |
| Food Group | Food Items |
| Grains | Breads include lavash, sangak, barbary, sandwich bread, toast, whole breads, and diet breads.  Pasta, noodles, cooked bulgur, rice  Potato in any type except chips |
| Vegetables | All vegetables including raw or cooked |
| Fruits | All fruits |
| Fish | All kinds of fish, cooked, fried, or canned |
| Chicken | Cooked, fried, baked |
| Red meat | All kinds of beef or lamb, liver, kidney, heart, brain, tongue |
| Processed meat | Sausage, hamburger |
| Eggs | Chicken egg |
| Dairy | Low or high fat and any milk drinks, Low or high fat and any flavored yogurts, all types of cheese, Kashk and doogh(Two traditional Iranian dairy) |
| legumes and Nuts | Beans, peas, lima beans, broad beans, lentils, cotyledons, soybean, mung bean, Walnuts, peanuts, almonds, pistachios, hazelnuts, roasted seeds, mixed nuts |
| Oils & Fat | All kinds of liquid and solid fat (except for olive oil) |
| Olive | Olive, olive oil |
| Honey | Honey |
| Sugar | Added sugar by individual to diet |
| Coffee & tea | Coffee, green, and black tea |
| Salt | Added salt in cooking or at the table |
