# Supplementary material for: Dietary pattern and odds of lung cancer: a large case-control study in Iran
Source: Springer Nature journal article supplement (doi:10.1186/s40795-025-01092-4), 2025-07-04
Supplement: MOESM2 [file 40795_2025_1092_MOESM2_ESM.docx]

| Appendix 2. Factor-loading matrix for major dietary patterns | | | |
| --- | --- | --- | --- |
| Food groups | Dietary patterns | | |
| Pesco vegetarian pattern | Animal and sugar pattern | Carbohydrate, fat and egg pattern |
| Grains | - | - | 0,25 |
| Vegetables | 0,40 | - | - |
| Fruits | 0,34 | - | - |
| Fish | 0,28 | - | - |
| Chicken | - | 0,24 | - |
| Red meat | - | 0,42 | -0,23 |
| Processed meat | - | 0,37 | - |
| Eggs | - | - | 0,29 |
| Dairy | - | 0,39 | -0,33 |
| legumes and Nuts | 0,34 | - | - |
| Oils & Fat | - | - | 0,51 |
| Olive | 0,37 | - | - |
| Honey | 0,36 | - | - |
| Sugar | - | 0,53 | - |
| Coffee& tea | - | 0,37 | 0,26 |
| Salt | - | - | 0,52 |
|  | | | - |
| Eigenvalue | 2,7 | 1,6 | 1,1 |
| Variance explained by each factor | 17 | 10 | 7 |
| Loading factors below 0,2 were omitted for simplicity.  KMO 0.76 | | |  |
