# Supplementary material for: Dietary pattern and odds of lung cancer: a large case-control study in Iran
Source: Springer Nature journal article supplement (doi:10.1186/s40795-025-01092-4), 2025-07-04
Supplement: MOESM3 [file 40795_2025_1092_MOESM3_ESM.docx]

| Supplementary Table 1. Odd of lung cancer among smokers and non-smokers with dietary patterns1 | | | | | | | | | | |
| --- | --- | --- | --- | --- | --- | --- | --- | --- | --- | --- |
|  |  | Non-smokers2 | | smokers | | | | | | |
|  |  | Cases/control | OR (95%CI) | | Cases/control | | | OR (95%CI) | P for interaction |
| Pesco vegetarian pattern | First tertile | 56/729 | Reference | | | | 123/321 | Reference | 0.67 |
| Second tertile | 49/721 | 0,81(0.54-1.21) | | | 126/323 | | 1.08(0.79-1.47) |
| Third tertile | 47/736 | 0.76(0.51-1.15) | | | 133/313 | | 1.09(0.81-1.49) |
| Animal and sugar pattern | First tertile | 55/716 | Reference | | | 115/324 | | Reference | 0.41 |
| Second tertile | 49/747 | 0.82(0.54-1.23) | | | 137/316 | | 1.14(0.83-1.55) |
| Third tertile | 48/723 | 0.82(0.54-1.23) | | | 130/317 | | 1.15(0.84-1.57) |
| Carbohydrate, fat and egg pattern | First tertile | 66/736 | Reference | | | 127/309 | | Reference | 0.29 |
| Second tertile | 48/732 | 0.72(0.49-1.08) | | | 135/321 | | 1.08(0.79-1.48) |
| Third tertile | 38/718 | 0.54(0.35-0.82) | | | 120/327 | | 1.09(0.81-1.49) |
| 1Adjusted for energy (continues, Kcal/d), age (five categories), sex (female, male), provinces (nine provinces of Iran), SES (low, medium, high), opium use (never user, user), cigarette smoking (no, yes), water pipe use (no, yes), regular alcohol use (no, yes), workload physical activity (sedentary, moderate, heavy) and BMI (continues, kg/m2)  2nonsmokers don’t use any cigarettes, water pipes or opium | | | | | | | | | | |
